# Supplementary material for: A supramolecular polymer formed by the combination of crown ether-based and charge-transfer molecular recognition
Source: Royal Society of Chemistry journal article supplement (doi:10.1039/c2py21028b), 2012-12-10
Supplement: c2py21028b.pdf [file c2py21028b.pdf]

# **A supramolecular polymer formed by the combination of crown ether-based and charge-transfer molecular recognitions**

Shengyi Dong, Lingyan Gao, Jianzhuang Chen, Guocan Yu, Bo Zheng and Feihe Huang\*

*MOE Key Laboratory of Macromolecular Synthesis and Functionalization, Department of Chemistry, Zhejiang University, Hangzhou, Zhejiang 310027, P. R. China,*

*Fax and Tel: +86-571-8795-3189; Email address: fhuang@zju.edu.cn.*

## **Electronic Supplementary Information (11 Pages)**

|                                                                           |            |
|---------------------------------------------------------------------------|------------|
| 1. <i>Materials and methods</i>                                           | <i>S2</i>  |
| 2. <i>Syntheses of monomers 1 and 2</i>                                   | <i>S3</i>  |
| 3. <i><sup>1</sup>H NMR spectra and UV/vis spectra of model compounds</i> | <i>S10</i> |

### *1. Materials and methods*

All reagents were commercially available and used as supplied without further purification. Compounds **3**,<sup>2a,S1</sup> **4**,<sup>S2</sup> and **5**<sup>S3</sup> were prepared according to the published procedures. NMR spectra were recorded with a Bruker Avance DMX 500 spectrophotometer or a Bruker Avance DMX 400 spectrophotometer using the deuterated solvent as the lock and the residual solvent or TMS as the internal reference. Low-resolution electrospray ionization mass spectra were recorded with a Bruker Esquire 3000 Plus spectrometer. High-resolution mass spectrometry experiments were performed with a Bruker Daltonics Apex III spectrometer. Viscosity measurements were carried out with a Cannon-Ubbelohde semi-micro dilution viscometer at 298 K in CH<sub>3</sub>CN. Scanning electron microscopy investigations were carried out on a JEOL 6390LV instrument. The melting points were collected on a SHPSIC WRS-2 automatic melting point apparatus. Electrospun supramolecular polymer nanofibers were obtained under the following conditions: 15 KV, 2.0 mL/h syringe flow rate, and 20 cm working distance, from a concentrated equimolar solution of 200 mM monomers **1** and **2**.

## 2. Syntheses of monomers **1** and **2**

### 2.1. Synthesis of monomer **1**

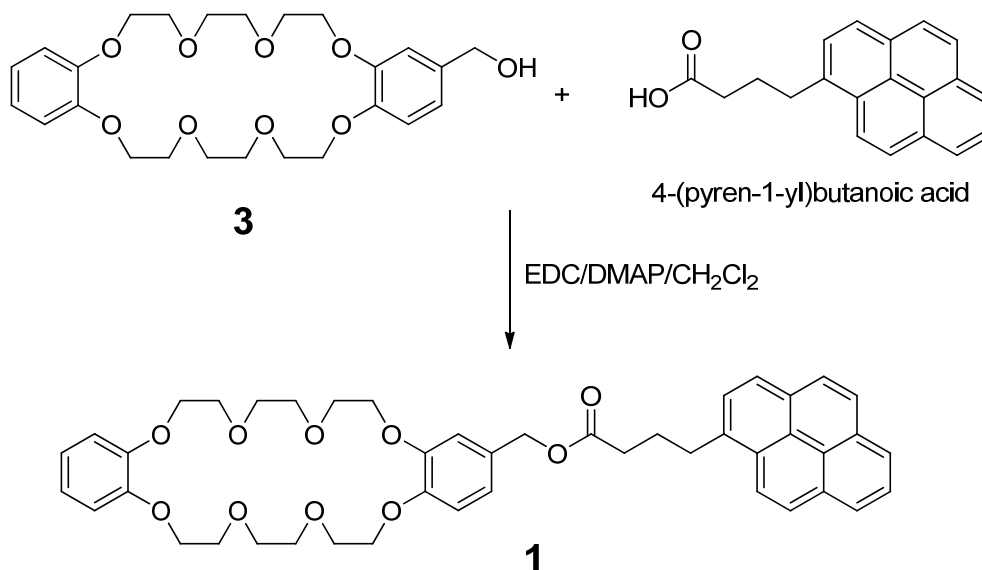

A mixture of **3** (4.78 g, 10 mmol), 4-(pyren-1-yl)butanoic acid (2.88 g, 10 mmol), 1-(3'-dimethylaminopropyl)-3-ethylcarbodiimide hydrochloride (EDC, 3.85 g, 20 mmol) and 4-dimethylaminopyridine (DMAP, catalytic amount) in CH<sub>2</sub>Cl<sub>2</sub> (50 mL) was stirred overnight at room temperature. After filtration, the solution was washed with water and brine. Then the organic layer was dried by MgSO<sub>4</sub> overnight. Dichloromethane was removed and the residue was purified by column chromatography (CH<sub>2</sub>Cl<sub>2</sub>/petroleum ether, 1:1, v/v) to afford **1** as a yellow solid (3.63 g, 48%). Mp: 144.2–146.5 °C. The <sup>1</sup>H NMR spectrum of compound **1** is shown in Figure S1. <sup>1</sup>H NMR (400 MHz, CDCl<sub>3</sub>, 298 K) δ (ppm): 8.15 (d, *J* = 8.0 Hz, 1H), 8.05 (dd, *J*<sub>1</sub> = 8.0 Hz, *J*<sub>2</sub> = 4.0 Hz, 2H), 7.98 (t, *J* = 8.0 Hz, 2H), 7.91 (s, 2H), 7.88 (d, *J* = 4.0 Hz, 1H), 7.73 (d, *J* = 8.0 Hz, 1H), 6.80–6.70 (m, 7H), 4.94 (s, 2H), 4.04–4.01 (m, 8H), 3.77–3.75 (m, 8H), 3.72 (s, 4H), 3.69 (s, 4H), 3.27 (d, *J* = 8.0 Hz, 2H), 2.39 (d, *J* = 8.0 Hz, 2H), 2.10 (d, *J* = 8.0 Hz, 2H). The <sup>13</sup>C NMR spectrum of **1** is shown in Figure S2. <sup>13</sup>C NMR (125 MHz, CDCl<sub>3</sub>, 298 K) δ (ppm): 25.74, 31.64, 32.87, 65.18, 68.27, 68.29, 68.36, 68.73, 70.16, 75.80, 76.05, 76.31, 112.54, 112.98, 113.34, 120.36, 123.89, 126.42, 134.60, 147.78, 147.84, 147.91, 172.25. LRESIMS is shown in Figure S3: *m/z* 771.5 [M + Na]<sup>+</sup> (100%). HRESIMS: *m/z* calcd for [M + H]<sup>+</sup> C<sub>45</sub>H<sub>49</sub>O<sub>10</sub>, 748.3247; found 748.3242; error –0.7 ppm.

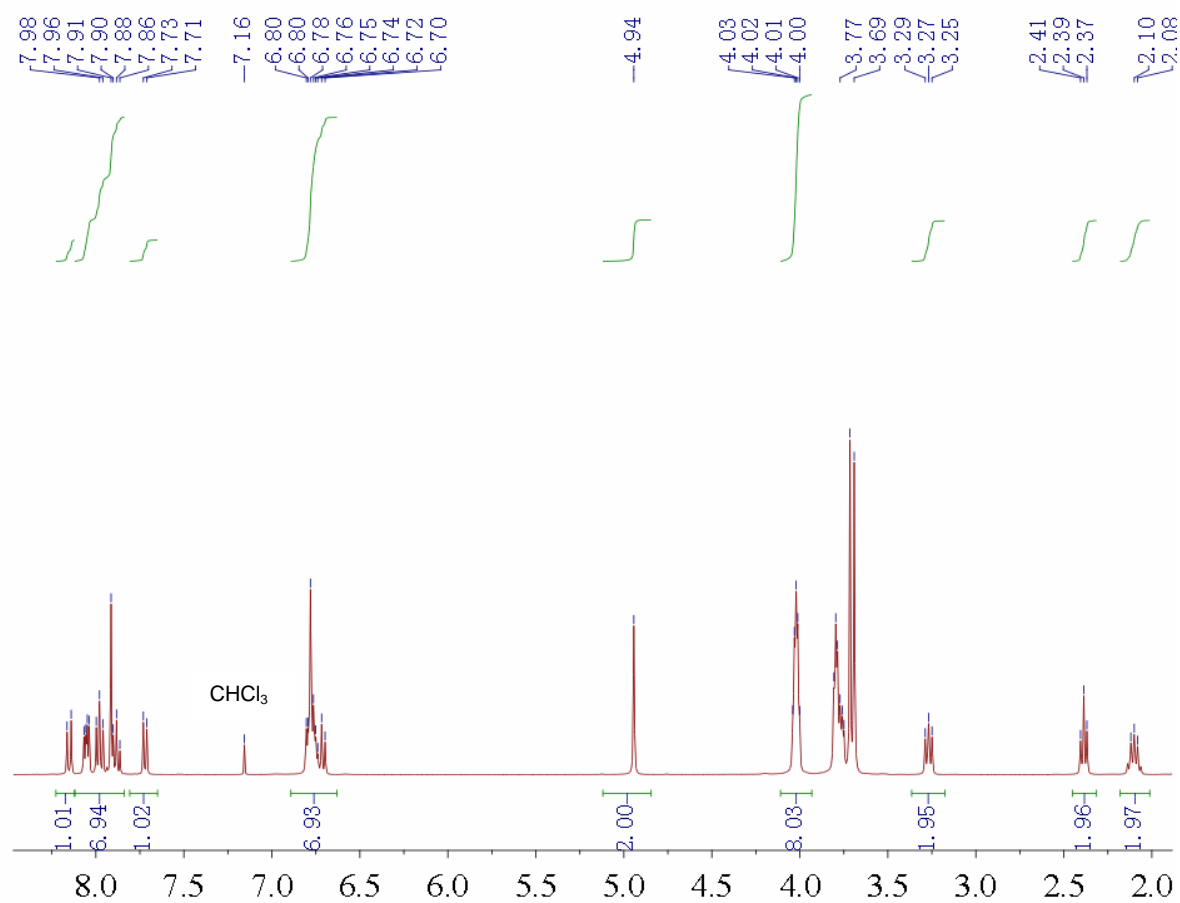

**Figure S1.**  $^1\text{H}$  NMR spectrum (400 MHz,  $\text{CDCl}_3$ , 298 K) of **1**.

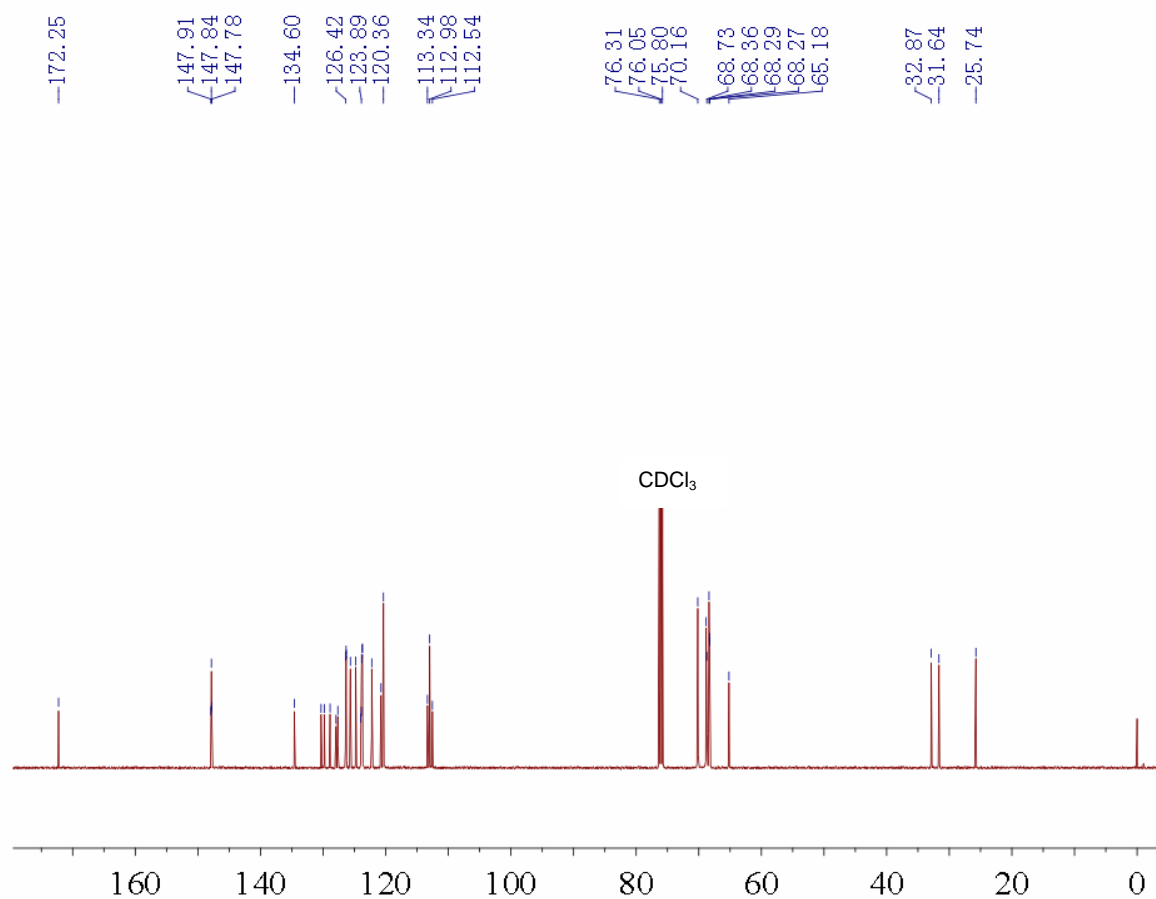

**Figure S2.**  $^{13}\text{C}$  NMR spectrum (125 MHz,  $\text{CDCl}_3$ , 298 K) of **1**.

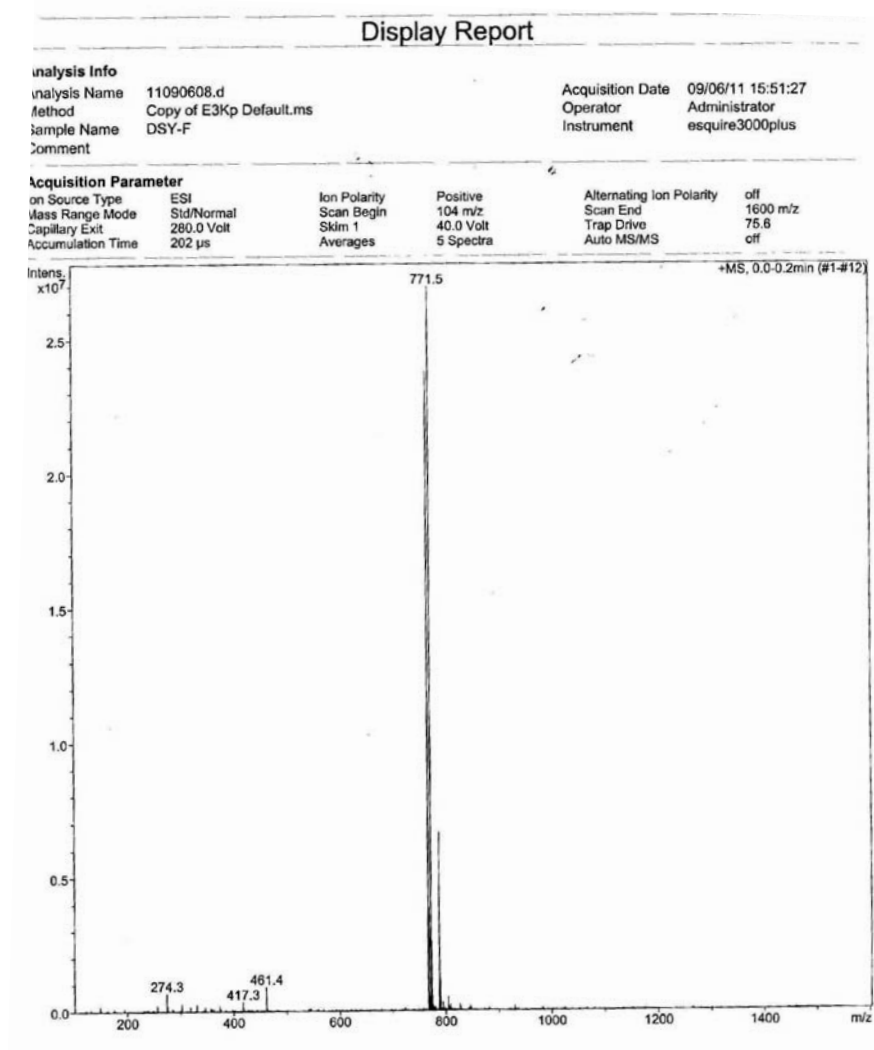

**Figure S3.** Electrospray ionization mass spectrum of **1**.

## 2.2. Synthesis of monomer 2

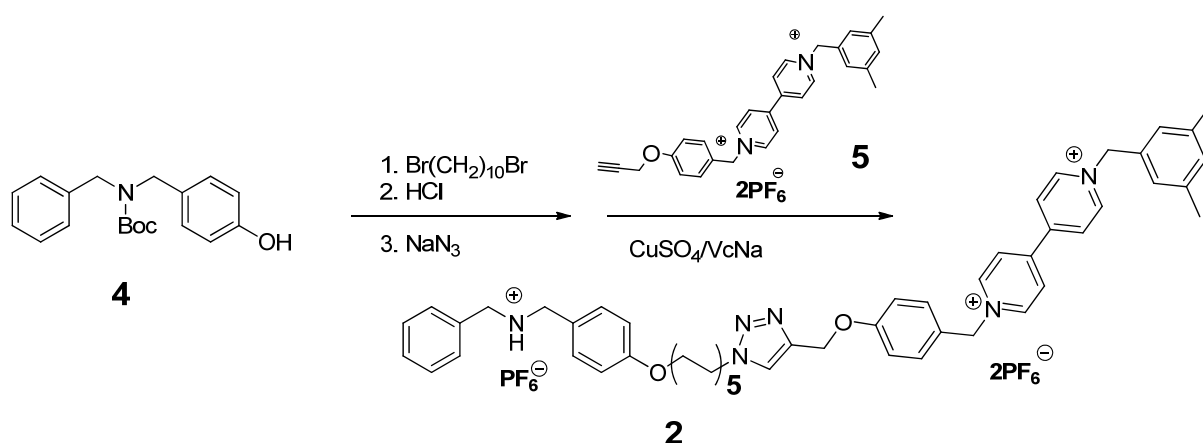

A mixture of **4** (3.13 g, 10 mmol), K<sub>2</sub>CO<sub>3</sub> (2.76 g, 20 mmol) and 1,10-dibromodecane (6.00 g, 20 mmol) in CH<sub>3</sub>CN (100 mL) was stirred under reflux overnight. Then the solvent was removed and the residue was dissolved in 10% HCl/ethyl acetate (50 mL) and the mixture was stirred overnight at room temperature. The white solid was filtered, washed with ethyl acetate thoroughly, and dissolved in warm deionized water/acetonitrile (250 mL, 5:1, v:v). A saturated aqueous solution of NH<sub>4</sub>PF<sub>6</sub> was added to afford a white precipitate, which was filtered and washed with deionized water. This white precipitate was added to a mixture of **5** (6.5 g, 9.1 mmol), CuSO<sub>4</sub>•5H<sub>2</sub>O (0.25 g, 1.0 mmol), Sodium *L*-ascorbate (VcNa, 0.40 g, 2.0 mmol) and DMF (25 mL). The mixture was stirred at 50 °C overnight. Then the mixture was dropped to cold water to yield a light yellow solid. The solid was filtered and recrystallized from CH<sub>3</sub>CN/MeOH/water to afford **2** as a gray solid (4.1 g, 37%). Mp: 189.8–192.3 °C. The <sup>1</sup>H NMR spectrum of compound **2** is shown in Figure S4. <sup>1</sup>H NMR (400 MHz, CD<sub>3</sub>SOCD<sub>3</sub>, 298 K) δ (ppm): 9.45 (d, *J* = 8.0 Hz, 4H), 8.69 (d, *J* = 8.0 Hz, 4H), 7.59 (d, *J* = 8.0 Hz, 2H), 7.45–7.36 (m, 8H), 7.21 (s, 2H), 7.13 (d, *J* = 8.0 Hz, 2H), 7.08 (s, 1H), 6.96 (d, *J* = 8.0 Hz, 2H), 5.83 (d, *J* = 8.0 Hz, 2H), 5.14 (s, 2H), 4.34 (t, *J* = 8.0 Hz, 2H), 3.95 (t, *J* = 8.0 Hz, 2H), 2.27 (s, 6H), 1.79–1.69 (m, 4H), 1.39–1.25 (m, 12H). The <sup>13</sup>C NMR spectrum of **2** is shown in Figure S5. <sup>13</sup>C NMR (125 MHz, CD<sub>3</sub>CN, 298 K) δ (ppm): 21.37, 26.85, 27.25, 29.79, 30.06, 30.16, 30.22, 30.31, 31.06, 51.27, 51.87, 52.00, 62.68, 65.54, 66.03, 69.21, 116.09, 116.92, 118.62, 123.67, 125.25, 126.07, 128.12, 128.53, 130.30, 130.76, 131.13, 132.13, 132.46, 132.64, 132.83, 133.68, 140.76, 144.13, 146.51, 146.69, 151.45, 151.50, 160.94, 161.36. LRESIMS is shown in Figure S6: *m/z* 270.2 [M – 3PF<sub>6</sub>]<sup>3+</sup> (100%), 480.1 [M – 2PF<sub>6</sub>]<sup>2+</sup> (100%). HRESIMS: *m/z* calcd for [M – PF<sub>6</sub>]<sup>+</sup> C<sub>53</sub>H<sub>63</sub>F<sub>12</sub>N<sub>6</sub>O<sub>2</sub>P<sub>2</sub>, 1105.4296; found 1105.4280; error –1.4 ppm.

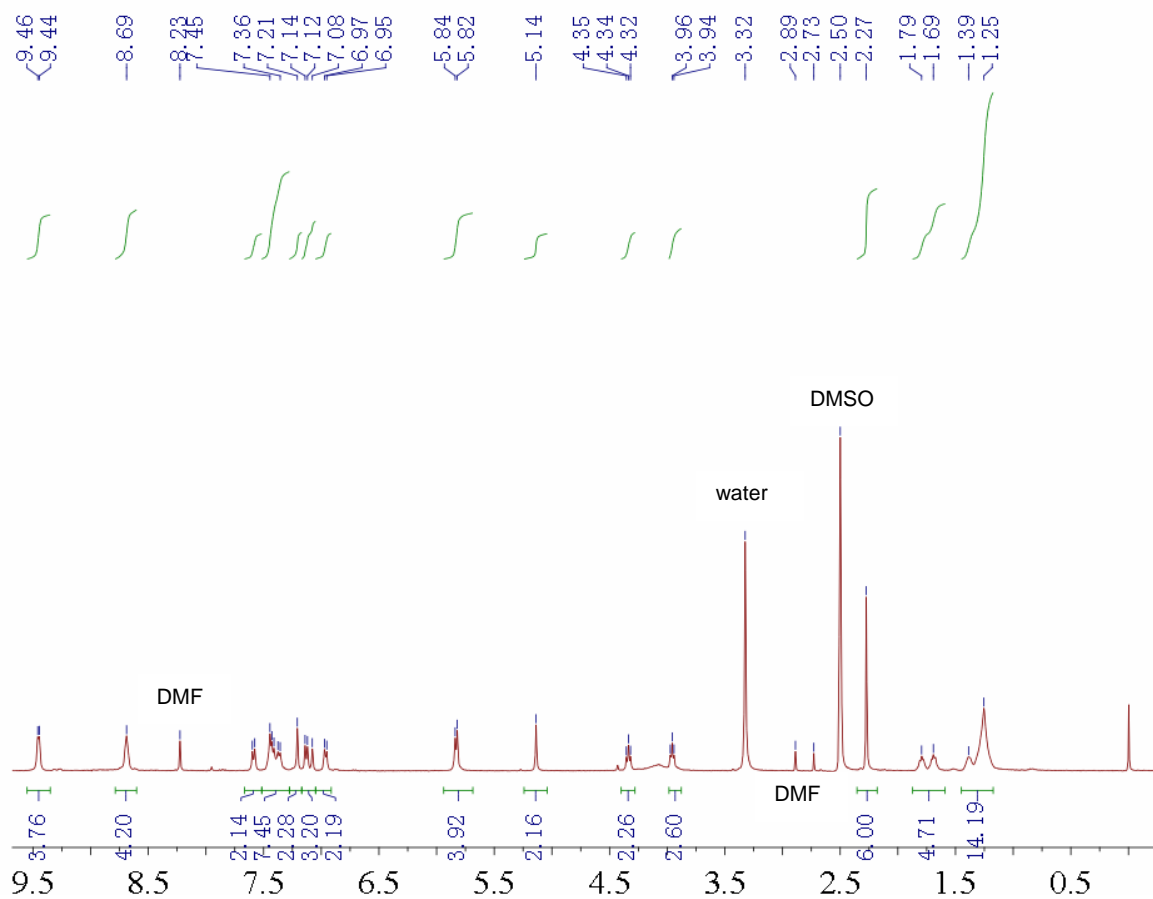

**Figure S4.** <sup>1</sup>H NMR spectrum (400 MHz, CD<sub>3</sub>SOCD<sub>3</sub>, 298 K) of **2**.

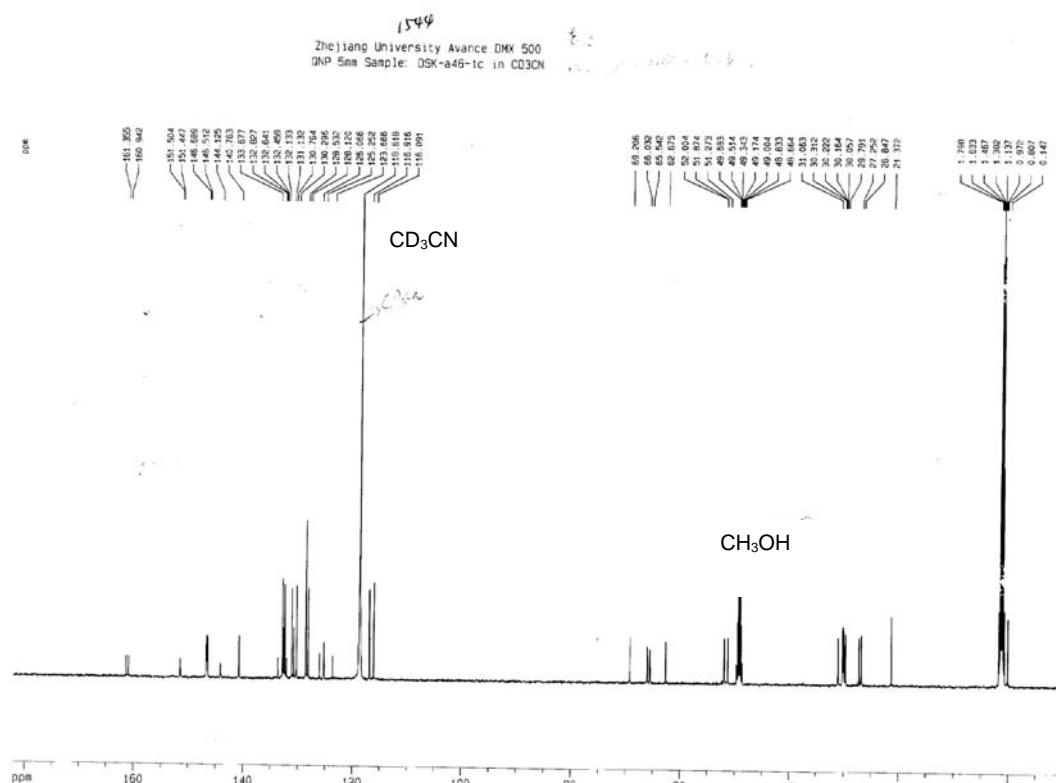

**Figure S5.** <sup>13</sup>C NMR spectrum (125 MHz, CD<sub>3</sub>CN, 298 K) of **2**.



Date: 24 May 2010 19:05:43

5.2

### Spectrum 1A Plot - 2010-5-24 19:05

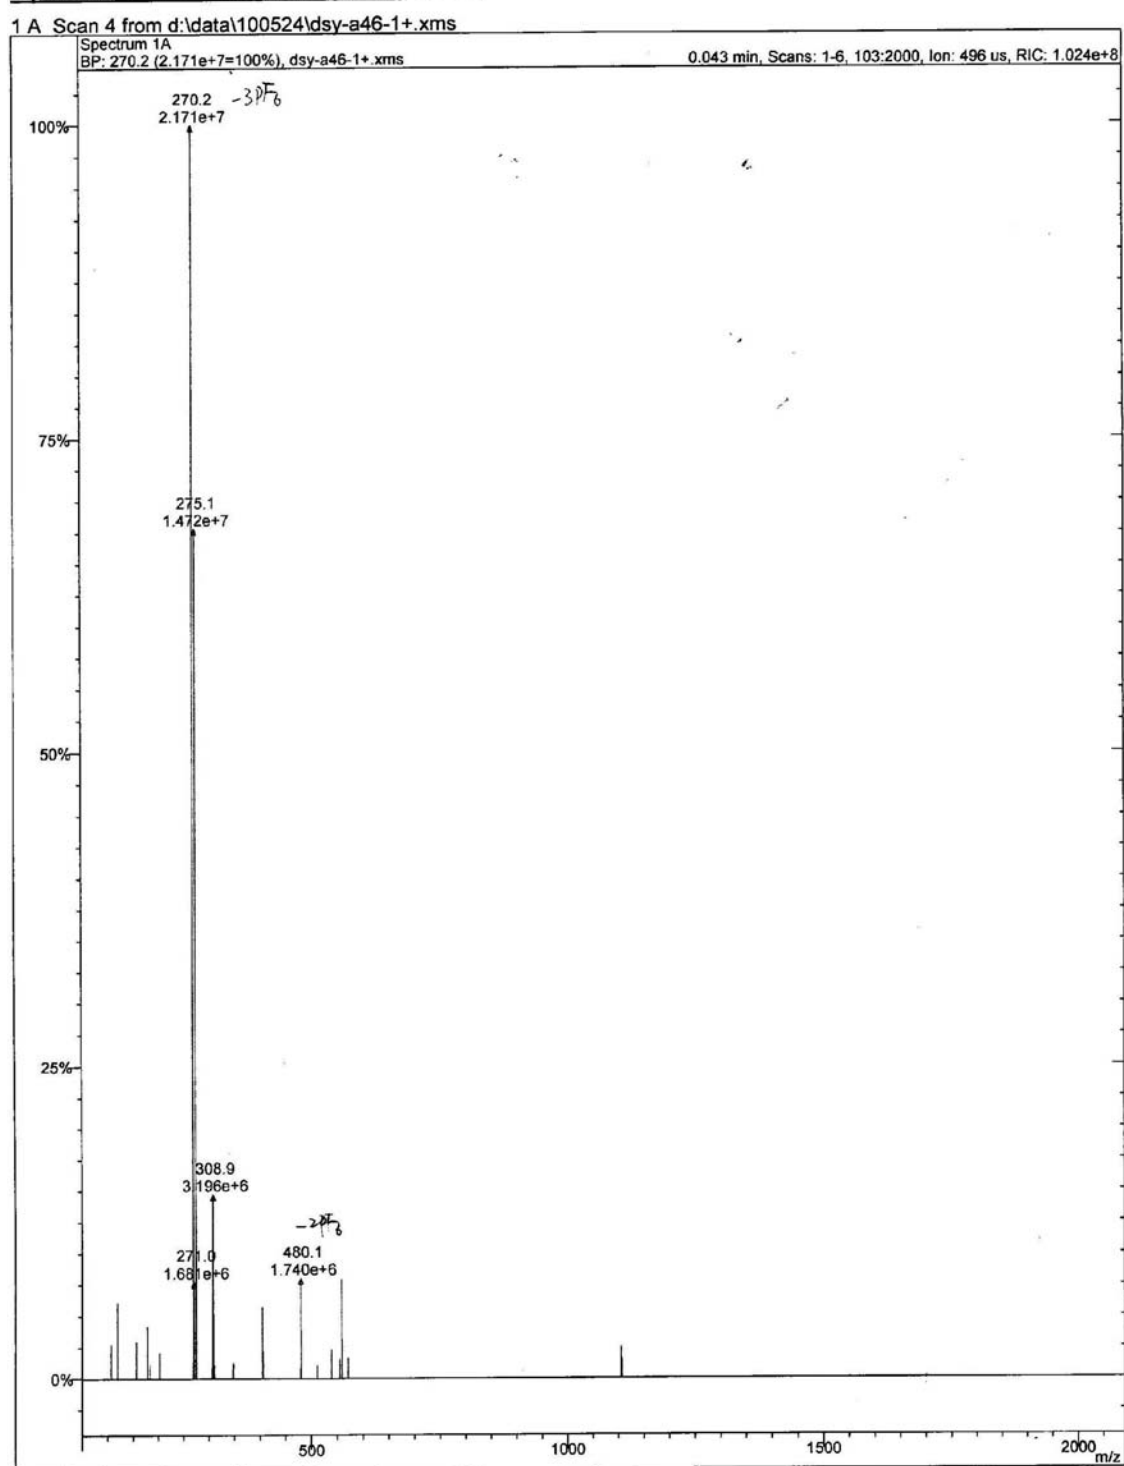

**Figure S6.** Electrospray ionization mass spectrum of **2**.

### 3. $^1\text{H}$ NMR spectra and UV/vis spectra of model compounds

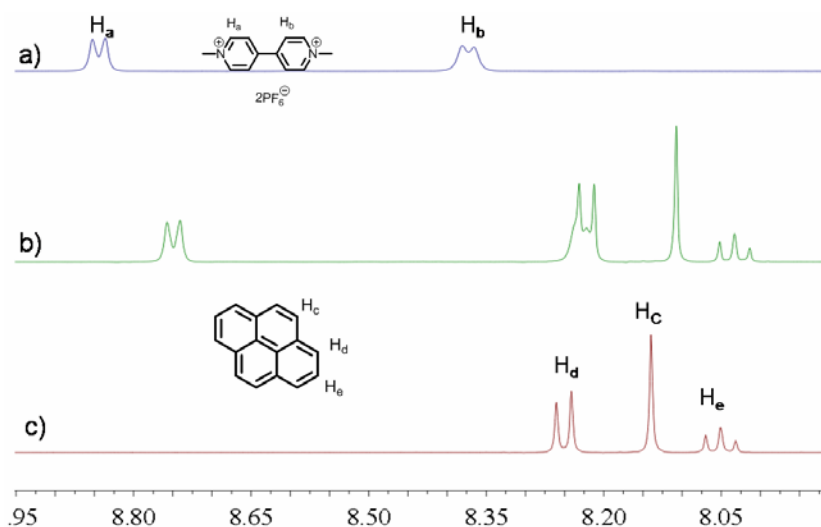

**Figure S7.** Partial  $^1\text{H}$  NMR spectra (400 MHz,  $\text{CD}_3\text{CN}$ , 298 K): a) paraquat (5.00 mM); b) paraquat and pyrene (both 5.00 mM); c) pyrene (5.00 mM).

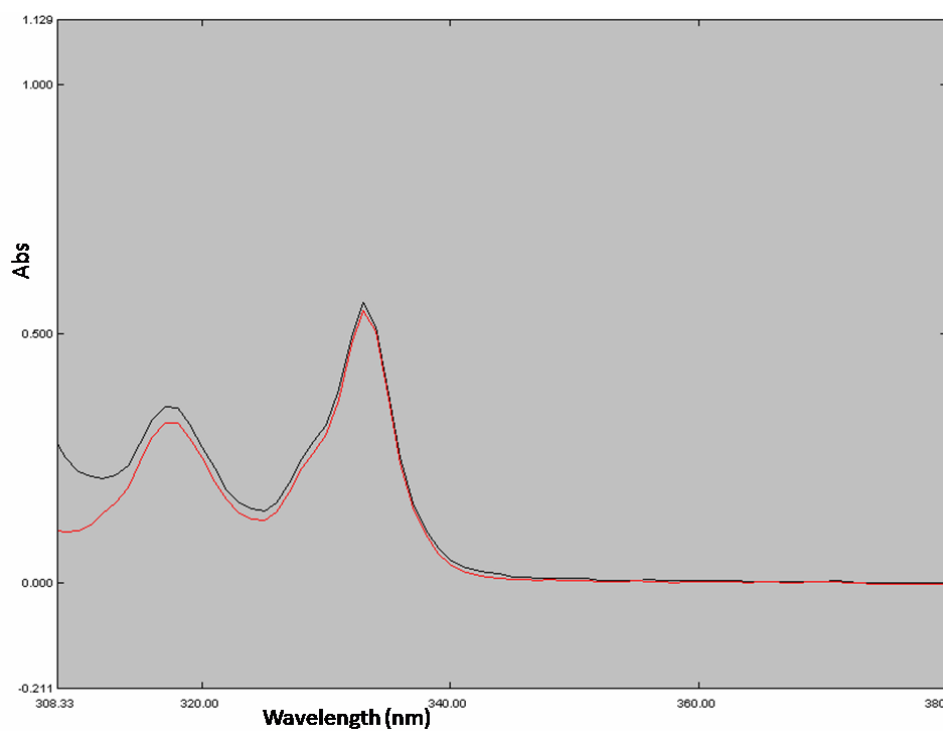

**Figure S8.** UV/Vis spectroscopy of pyrene (red line) and pyrene-paraquat complexes (black line). The concentrations of pyrene and paraquat are  $0.45 \times 10^{-4}$  M.

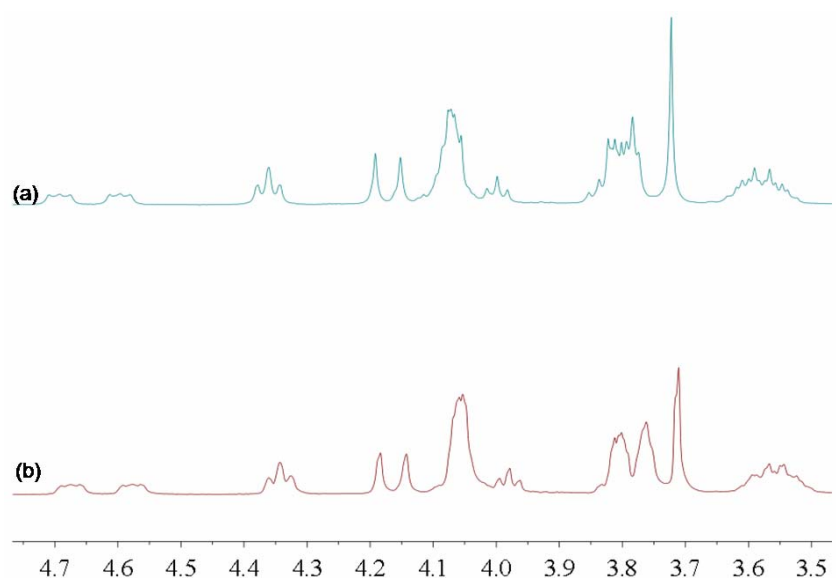

**Figure S9.** Partial  $^1\text{H}$  NMR spectra (400 MHz,  $\text{CD}_3\text{CN}$ , 298 K): a) dibenzo-24-crown-8 and monomer **2** (1.00 mM for each); b) after adding pyrene (1.00 mM).

*References:*

- S1. F. Wang, C. Han, C. He, Q. Zhou, J. Zhang, C. Wang, N. Li and F. Huang, *J. Am. Chem. Soc.*, 2008, **130**, 11254–11255.
- S2. L. Wu, Y.-M. He and Q.-H. Fan, *Adv. Synth. Catal.*, 2011, **353**, 2915–2919.
- S3. S. Dong, X. Yan, B. Zheng, J. Chen, X. D, X. Y, D. Xu, M. Zhang and F. Huang, *Chem. Eur. J.*, 2012, **18**, 4195–4199.
